# Supplementary material for: Transient Silencing of a Type IV P-Type ATPase,Atp10c, Results in Decreased Glucose Uptake in C2C12 Myotubes
Source: Hindawi journal article supplement (doi:10.1155/2012/152902), 2012-01-01
Supplement: f1 [file 152902.f1.pdf]

**Hurst et al. Supplemental Material**

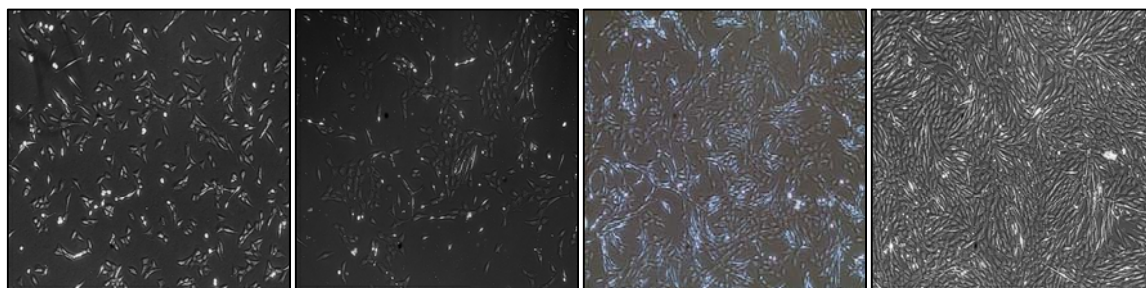

Figure 1 Supplemental Material: C2C12 myoblast differentiation into myotubes as described in the Materials and Methods section. Cells were seeded into 60 mm dishes and allowed to attach. After 24 hours, differentiation was stimulated via the addition of horse serum (2%) enriched media. Differentiation media was changed every 48 hours until the process was complete. Images were produced on Digital USB2 Microscope (Westover Scientific Inc., Mill Creek, WA) using Micron imaging software.
