# Supplementary material for: Transient Silencing of a Type IV P-Type ATPase,Atp10c, Results in Decreased Glucose Uptake in C2C12 Myotubes
Source: Hindawi journal article supplement (doi:10.1155/2012/152902), 2012-01-01
Supplement: f2 [file 152902.f2.pdf]

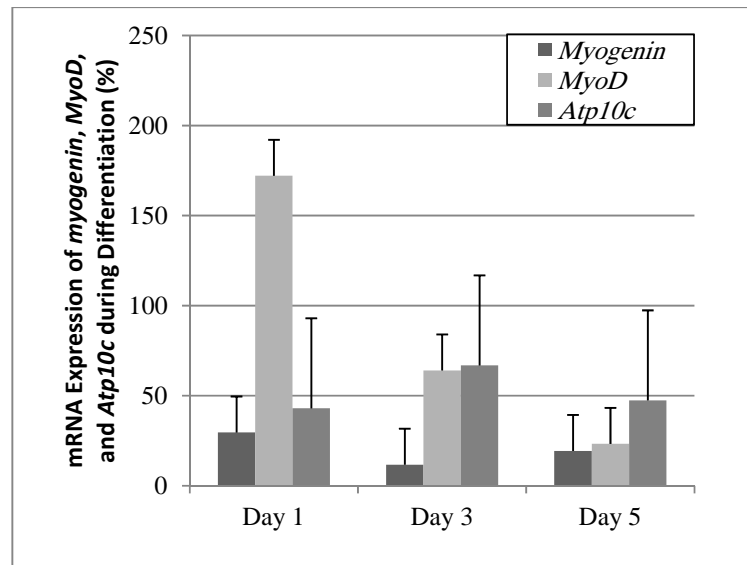

Figure 2 Supplemental Material: C2C12 cells were differentiated from myoblasts to myotubes as described in the Materials and Methods section. Cells were collected at the above time points and *Gapdh* (housekeeping gene), *MyoD*, *myogenin* and *Atp10c* gene mRNA expression was further analyzed using Real time PCR. Data represents three independent experiments with each sample repeated in triplicate.
